# Supplementary material for: Reversal of proliferation deficits caused by chromosome 16p13.11 microduplication through targeting NFκB signaling: an integrated study of patient-derived neuronal precursor cells, cerebral organoids and in vivo brain imaging
Source: PubMed Central journal article supplement (PMC6344377; doi:10.1038/s41380-018-0292-1), 2018-11-06
Supplement: 41380_2018_292_MOESM4_ESM.pdf [file 41380_2018_292_MOESM4_ESM.pdf]

**Supplementary Table S2: List of antibodies used**

| <b>Antibody</b>                        | <b>Host</b>                    | <b>Company</b> | <b>Cat. No.</b> | <b>Working Dilution</b>     |
|----------------------------------------|--------------------------------|----------------|-----------------|-----------------------------|
| <b>β-ACTIN</b>                         | Mouse monoclonal IgG2b         | ThermoFisher   | MA5-15739       | 1:1,000 (WB)                |
| <b>Brachyury</b>                       | Goat polyclonal                | R&D Systems    | AF2085          | 1:100 (ICC)                 |
| <b>CTIP2</b>                           | Rat monoclonal IgG2a           | Abcam          | ab18465         | 1:500 (ICC)                 |
| <b>FOXA2</b>                           | Goat polyclonal                | R&D Systems    | AF2400          | 1:100 (ICC)                 |
| <b>FOXG1</b>                           | Rabbit polyclonal              | Abcam          | ab18259         | 1:500 (ICC)                 |
| <b>GATA-4</b>                          | Mouse monoclonal IgG2a         | Santa Cruz     | SC-25310        | 1:100 (ICC)                 |
| <b>GFAP</b>                            | Rabbit polyclonal              | Dako           | Z0334           | 1:500 (ICC)                 |
| <b>Histone H3 (phospho S10)</b>        | Mouse monoclonal IgG           | Abcam          | ab14955         | 1:300 (ICC)                 |
| <b>MAP2</b>                            | Mouse monoclonal IgG1          | Sigma          | M9942           | 1:500 (ICC)                 |
| <b>NANOG</b>                           | Goat monoclonal IgG1           | R&D Systems    | AF1997          | 1:100 (ICC)                 |
| <b>N-Cadherin</b>                      | Mouse monoclonal IgG1          | BD Biosciences | 610920          | 1:500 (ICC)                 |
| <b>NDE1</b>                            | Rabbit polyclonal              | Proteintech    | 10233-1-AP      | 1:100 (ICC)<br>1:500 (WB)   |
| <b>NESTIN</b>                          | Mouse monoclonal IgG1          | Millipore      | MAB5326         | 1:100 (ICC)                 |
| <b>Phosph-NF-κB p65 (Ser536)</b>       | Rabbit monoclonal IgG1         | Cell Signaling | 3033            | 1:100 (ICC)<br>1:1,000 (WB) |
| <b>NF-κB p65 (C-20)</b>                | Rabbit polyclonal              | Santa Cruz     | SC-372          | 1:100 (ICC)<br>1:300 (WB)   |
| <b>NF-κB p65 (F-6)</b>                 | Mouse monoclonal               | Santa Cruz     | SC-8008         | 1:100 (ICC)<br>1:200 (WB)   |
| <b>Oct3/4 (C-10)</b>                   | Mouse monoclonal IgG2B         | Santa Cruz     | SC-5279         | 1:250 (ICC)                 |
| <b>OTX-2</b>                           | Goat polyclonal                | R&D Systems    | AF1979          | 1:100 (ICC)                 |
| <b>Pax-6</b>                           | Rabbit polyclonal              | BioLegend      | 901301          | 1:300 (ICC)                 |
| <b>Reelin (clone 142)</b>              | Mouse monoclonal IgG1          | Millipore      | MAB5366         | 1:200 (ICC)                 |
| <b>SATB2</b>                           | Mouse monoclonal IgG1          | Abcam          | ab51502         | 1:100 (ICC)                 |
| <b>SOX1</b>                            | Goat polyclonal                | R&D Systems    | AF3369          | 1:100 (ICC)                 |
| <b>SOX2</b>                            | Rabbit polyclonal              | Abcam          | ab97959         | 1:100 (ICC)                 |
| <b>SOX17</b>                           | Goat polyclonal                | R&D Systems    | AF1924          | 1:200 (ICC)                 |
| <b>Tbr2</b>                            | Rabbit polyclonal              | Millipore      | AB2283          | 1:300 (ICC)                 |
| <b>Tra-1-60</b>                        | Mouse monoclonal IgM           | Stemgent       | 09-0010         | 1:100 (ICC)                 |
| <b>β-III Tubulin</b>                   | Mouse monoclonal (isotype III) | Sigma          | T5076           | 1:100 (ICC)                 |
| <b>Phosphorylated Vimentin (Ser55)</b> | Mouse monoclonal IgG2B         | MBL            | D076-3          | 1:300 (ICC)                 |
| <b>Vinculin</b>                        | Rabbit monoclonal              | Abcam          | ab129002        | 1:10,000 (WB)               |
