# Supplementary material for: Reversal of proliferation deficits caused by chromosome 16p13.11 microduplication through targeting NFκB signaling: an integrated study of patient-derived neuronal precursor cells, cerebral organoids and in vivo brain imaging
Source: PubMed Central journal article supplement (PMC6344377; doi:10.1038/s41380-018-0292-1), 2018-11-06
Supplement: 41380_2018_292_MOESM6_ESM.pdf [file 41380_2018_292_MOESM6_ESM.pdf]

Supplementary Table S4: Antibodies used in RPPA study

| Antibody                                    | Supplier                    | Catalog Number | Species    |
|---------------------------------------------|-----------------------------|----------------|------------|
| PARP                                        | Cell Signaling Technologies | 9542           | rabbit     |
| p44/42 MAPK (ERK1/2)                        | Cell Signaling Technologies | 9102           | rabbit     |
| p44/42 MAPK (ERK1/2) P Thr202/Thr185,Tyr204 | Cell Signaling Technologies | 4370           | rabbit     |
| Akt                                         | Cell Signaling Technologies | 9272           | rabbit     |
| Akt P Ser473                                | Cell Signaling Technologies | 4060           | rabbit     |
| PARP cleaved Asp214                         | Cell Signaling Technologies | 9541           | rabbit     |
| beta-actin                                  | Cell Signaling Technologies | 4970           | rabbit     |
| beta-Catenin                                | Cell Signaling Technologies | 9562           | rabbit     |
| beta-Catenin P Ser33,Ser37,Thr41            | Cell Signaling Technologies | 9561           | rabbit     |
| PTEN                                        | Cell Signaling Technologies | 9552           | rabbit     |
| PTEN P Ser380,Thr382,Thr383                 | Cell Signaling Technologies | 9554           | rabbit     |
| SAPK/JNK                                    | Cell Signaling Technologies | 9258           | rabbit     |
| GSK-3-alpha/beta P Ser21/Ser9               | Cell Signaling Technologies | 9331           | rabbit     |
| p53 P Ser15                                 | Cell Signaling Technologies | 9284           | rabbit     |
| p38 MAPK PThr180,Tyr182                     | Cell Signaling Technologies | 9211           | rabbit     |
| p38 MAPK                                    | Cell Signaling Technologies | 9212           | rabbit     |
| mTOR P Ser2448                              | Cell Signaling Technologies | 2971           | rabbit     |
| mTOR                                        | Cell Signaling Technologies | 2972           | rabbit     |
| p90 S6 kinase (Rsk1-3) P Thr359,Ser363      | Cell Signaling Technologies | 9344           | rabbit     |
| Smad1/5 P Ser463/Ser465                     | Cell Signaling Technologies | 9516           | rabbit     |
| Cyclin D1 P Thr286                          | Cell Signaling Technologies | 3300           | rabbit     |
| Caspase 3                                   | Cell Signaling Technologies | 9662           | rabbit     |
| Caspase 3 cleaved                           | Cell Signaling Technologies | 9664           | rabbit     |
| p53                                         | Cell Signaling Technologies | 9282           | rabbit     |
| GSK-3-beta P Ser9                           | Cell Signaling Technologies | 9336           | rabbit     |
| GSK-3-beta                                  | Cell Signaling Technologies | 9315           | rabbit     |
| Prohibitin                                  | Santa Cruz                  | sc-28259       | rabbit     |
| p21 CIP/WAF1 p Thr145                       | Santa Cruz                  | 20220-R        | rabbit     |
| p90 S6 kinase (Rsk1-3)                      | Santa Cruz                  | sc-231         | rabbit     |
| p21 CIP/WAF1                                | Cell Signaling Technologies | 2946           | mouseIgG2a |
| CamKII P Thr286                             | Cell Signaling Technologies | 3361           | rabbit     |
| ErbB-1/EGFR                                 | Cell Signaling Technologies | 2232           | rabbit     |
| ErbB-2/Her2/EGFR P Tyr1248/Tyr1173          | Cell Signaling Technologies | 2244           | rabbit     |
| ErbB-3/Her3/EGFR                            | Cell Signaling Technologies | 4754           | rabbit     |
| ErbB-3/Her3/EGFR P Tyr1289                  | Cell Signaling Technologies | 4791           | rabbit     |
| EGFR P Tyr1173                              | Cell Signaling Technologies | 4407           | rabbit     |
| NFkB p65 Ser536                             | Cell Signaling Technologies | 3033           | rabbit     |
| beta-Catenin P Thr41,Ser45                  | Cell Signaling Technologies | 9565           | rabbit     |
| cdc25A                                      | Cell Signaling Technologies | 3652           | rabbit     |
| VEGFR P Tyr1175                             | Cell Signaling Technologies | 2478           | rabbit     |
| Cyclin D1                                   | Cell Signaling Technologies | 2926           | mouseIgG2a |
| PLC-gamma1 P Tyr783                         | Cell Signaling Technologies | 2821           | rabbit     |
| CREB                                        | Cell Signaling Technologies | 9197           | rabbit     |
| EGFR P Tyr1086                              | Cell Signaling Technologies | 369700         | rabbit     |
| PLC-gamma1                                  | Cell Signaling Technologies | 2822           | rabbit     |
| Tau                                         | Cell Signaling Technologies | 1178-1         | rabbit     |
| VEGFR P Tyr951                              | Cell Signaling Technologies | 4991           | rabbit     |
| Tau Phospho/non Phos ser 305                | Cell Signaling Technologies | 2368-1         | rabbit     |
| VEGFR P Tyr1059                             | Cell Signaling Technologies | 3817           | rabbit     |
| NFkB p105/p50                               | Calbiochem                  | GTX110585      | rabbit     |
| ErbB-2/Her2/EGFR                            | Merck (Calbiochem)          | PC116          | rabbit     |
| CamKII alpha (22B1) P Thr286                | Abcam                       | ab7260         | mouseIgG1  |
| GFAP                                        | Abcam                       | ab6046         | rabbit     |
| beta-Tubulin                                | Abcam                       | ab32502        | rabbit     |
| PKC-gamma P Thr514                          | Millipore (Upstate)         | 09-343SP       | rabbit     |
| mTOR P Ser2481                              | Cell Signaling Technologies | 2405           | rabbit     |
