# Supplementary material for: Reversal of proliferation deficits caused by chromosome 16p13.11 microduplication through targeting NFκB signaling: an integrated study of patient-derived neuronal precursor cells, cerebral organoids and in vivo brain imaging
Source: PubMed Central journal article supplement (PMC6344377; doi:10.1038/s41380-018-0292-1), 2018-11-06
Supplement: 41380_2018_292_MOESM7_ESM.pdf [file 41380_2018_292_MOESM7_ESM.pdf]

Supplementary Table S1

| Subject                               | Sex                                               | Diagnosis                                                                            | Genotype                                                                                                                                                                                                                                     | Psychotropic Medications (Prescribed at time of biopsy)  | Age at Onset/<br>Age at Biopsy/<br>Age at MRI |
|---------------------------------------|---------------------------------------------------|--------------------------------------------------------------------------------------|----------------------------------------------------------------------------------------------------------------------------------------------------------------------------------------------------------------------------------------------|----------------------------------------------------------|-----------------------------------------------|
| Control 1                             | Female<br>(Daughter of Case 2 & Sister of case 3) | Unaffected                                                                           | Non-Carrier                                                                                                                                                                                                                                  | None                                                     | NA/<br>29 yo/<br>30 yo                        |
| Control 2                             | Male<br>(Spouse of case 2 & Father of case 3)     | Unaffected                                                                           | Non-Carrier                                                                                                                                                                                                                                  | None                                                     | NA/<br>55 yo/<br>55 yo                        |
| Control 3                             | Male                                              | Unaffected control from Scottish t1:11 <i>DISC1</i> family                           | Non-Carrier (ID No. 40 from Suppl. Ref. 4)                                                                                                                                                                                                   | None                                                     | NA/<br>75 yo/<br>75 yo                        |
| Control 4                             | Female                                            | Unaffected control from Scottish t1:11 <i>DISC1</i> family                           | Non-Carrier (ID No. 28 from Suppl. Ref. 4)                                                                                                                                                                                                   | None                                                     | NA/<br>52 yo/<br>52 yo                        |
| Control 5                             | Female                                            | Unaffected                                                                           | Non-Carrier                                                                                                                                                                                                                                  | None                                                     | NA/<br>46 yo/<br>NA                           |
| Case 1                                | Female                                            | Paranoid schizophrenia                                                               | 16p13.11 dup carrier                                                                                                                                                                                                                         | Olanzapine                                               | 14 yo<br>(psychosis)/<br>47 yo/<br>47 yo      |
| Case 2                                | Female<br>(Affected mother of case 3)             | Generalised anxiety disorder/<br>recurrent depression                                | 16p13.11 dup carrier                                                                                                                                                                                                                         | Amitriptyline                                            | 18 yo<br>(Depression)/<br>48 yo/<br>50 yo     |
| Case 3<br>[UK10K_M<br>UIR15238<br>98] | Male<br>(Son of case 2 and control 2)             | Paranoid schizophrenia,<br>intellectual disability,<br>tuberous sclerosis,<br>autism | 16p13.11 dup carrier/ <i>TSC2</i> LOF mutation<br><br>(UK10K sequencing study: found to have a LoF variant in <i>TSC2</i> at 16:2115634:C/T. This is a stop-gained de novo variant in the <i>tuberin</i> gene, linked to tuberous sclerosis) | Olanzapine<br>Sodium Valproate<br>Fluoxetine<br>Diazepam | 18 yo<br>(psychosis)<br>24 yo/<br>26 yo       |

## Supplementary Table S1

Extended clinical details:

Case 1: Diagnosed with paranoid schizophrenia at age 14 years. Experiences auditory hallucinations, paranoia and thought disorder.

Case 2: Diagnosed with depression in her late teens and has suffered multiple recurrent episodes over the years. Also suffers from generalised anxiety disorder.

Case 3: Experiences command hallucinations, low mood, reduced motivation and poor self-care. First diagnosed with depression at 18 years of age and found to be psychotic. Responding to unseen stimuli, paranoid, agitated and aggressive when unwell. Four episodes of psychosis in past 5 years with multiple inpatient psychiatric admissions. Head CT's have not shown any associated tubers although known to have a *de novo* loss-of-function mutation in *TSC2*. EEGs within normal limits.

---
