# Supplementary material for: Reversal of proliferation deficits caused by chromosome 16p13.11 microduplication through targeting NFκB signaling: an integrated study of patient-derived neuronal precursor cells, cerebral organoids and in vivo brain imaging
Source: PubMed Central journal article supplement (PMC6344377; doi:10.1038/s41380-018-0292-1), 2018-11-06

Supplementary Figure 2

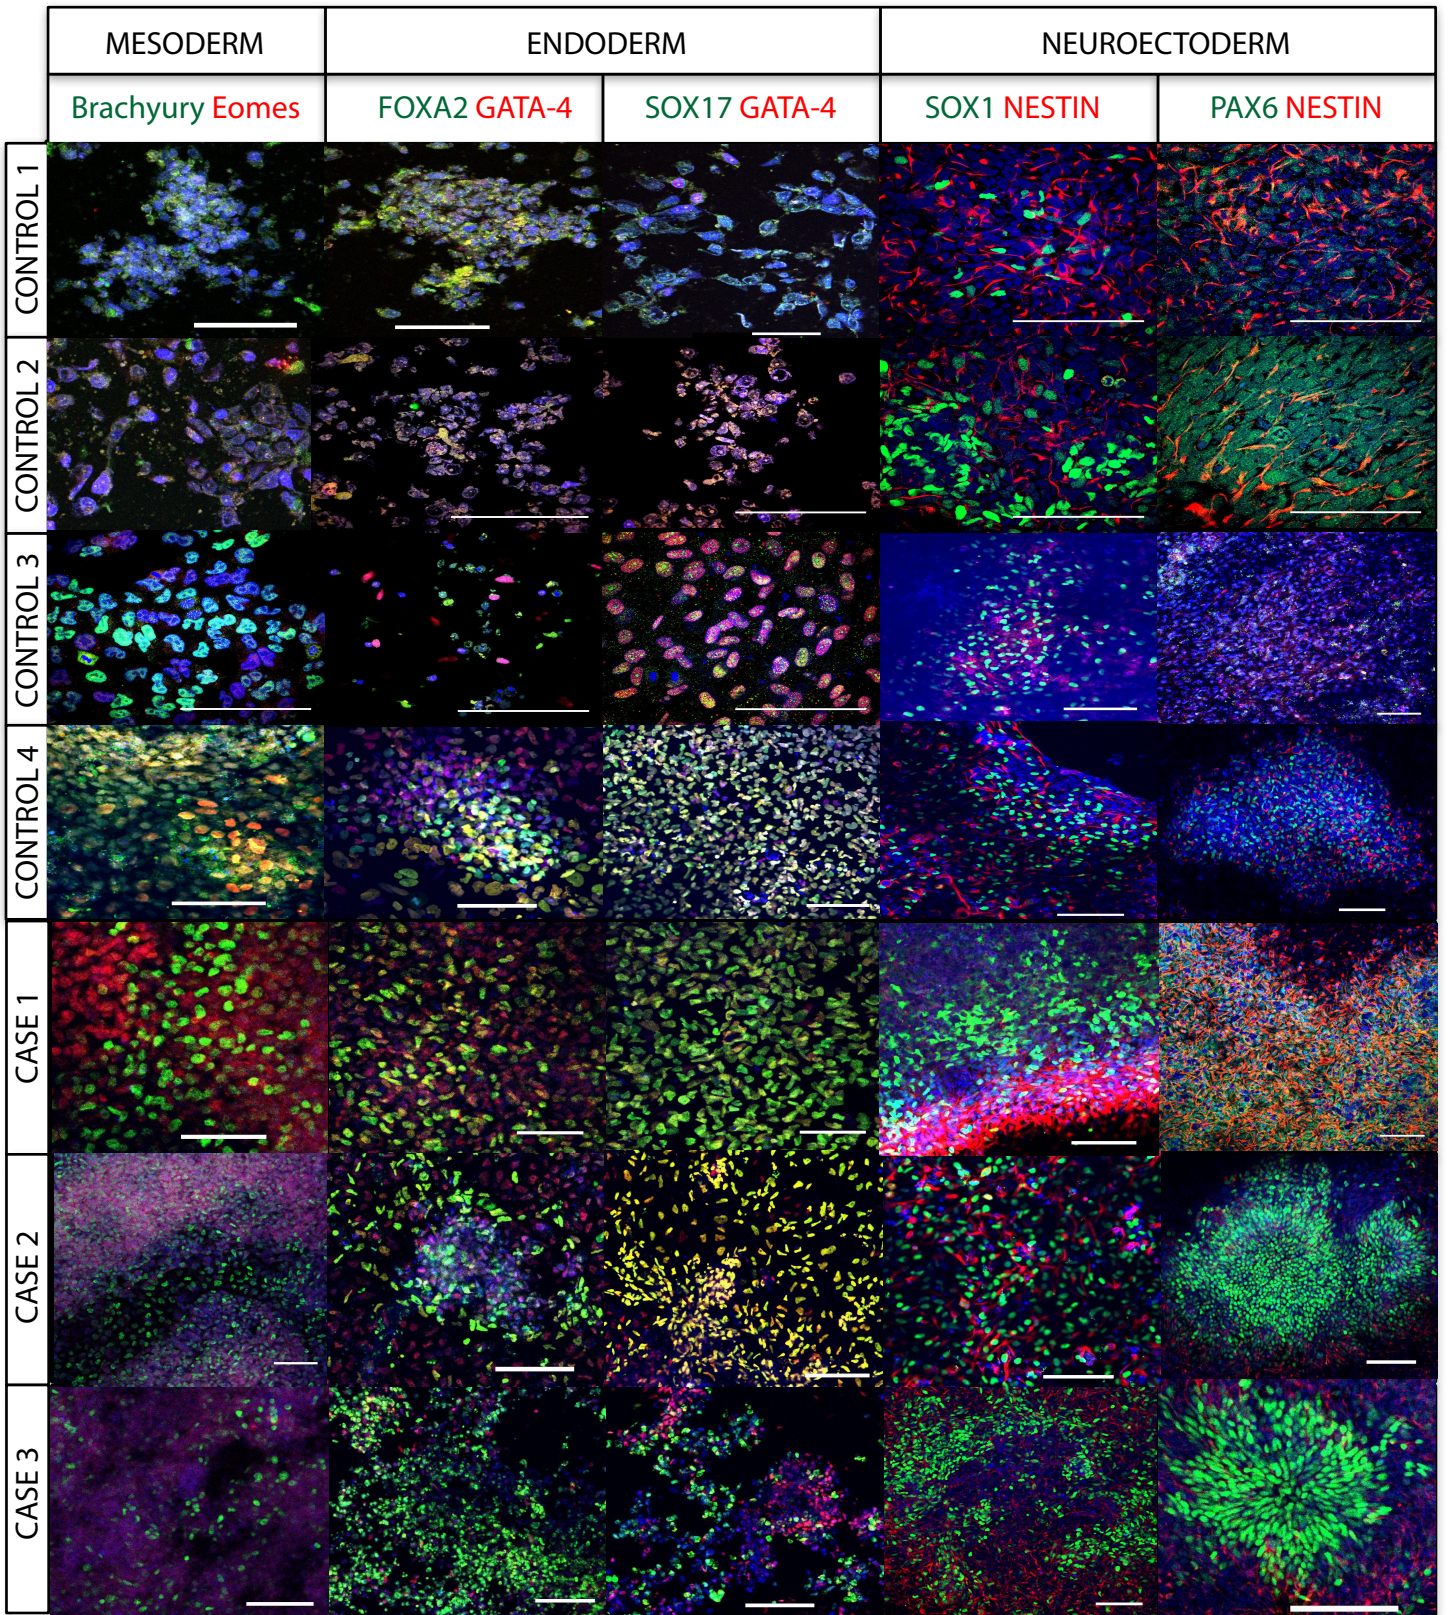

Supplement: 41380_2018_292_MOESM9_ESM.pdf [file 41380_2018_292_MOESM9_ESM.pdf]
